# Supplementary material
Source: Springer Nature journal article supplement (https://www.springermedizin.de/resource/supplementary/12990_2009_227_MOESM3_ESM.pdf/9612834)

**A****Dil**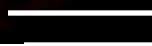**B****CBS****C****P2X3R****D****Dil+CBS****E****Dil+P2X3R****F****CBS+P2X3R**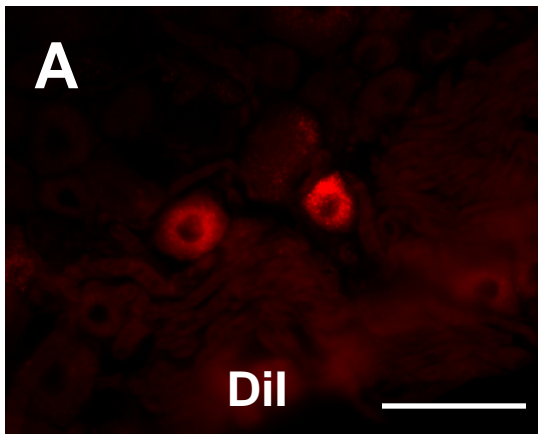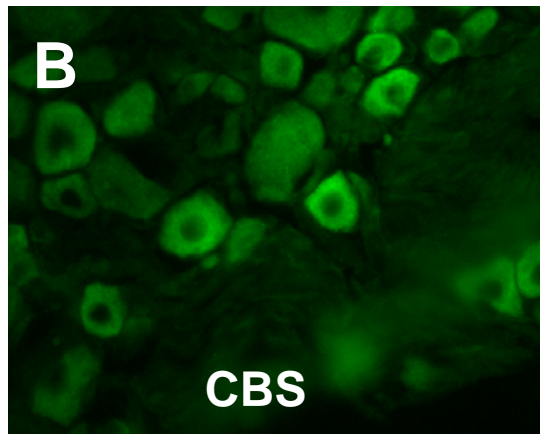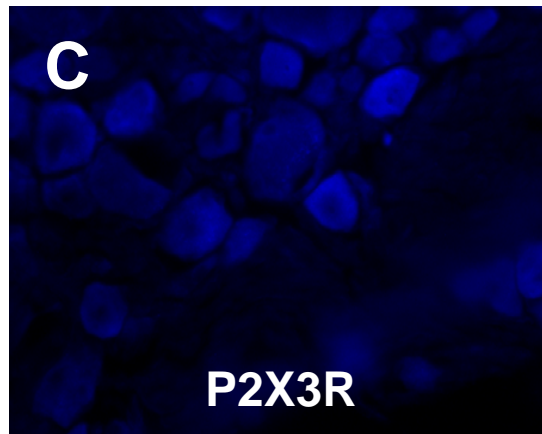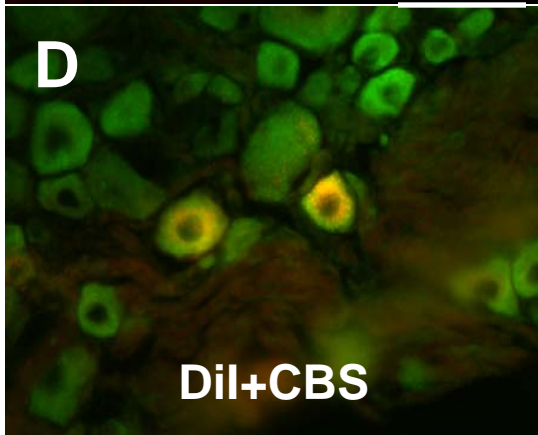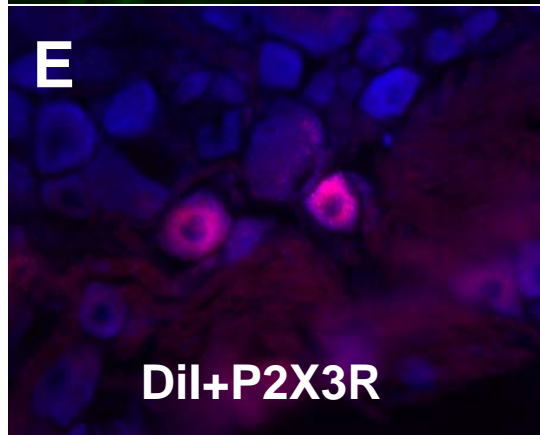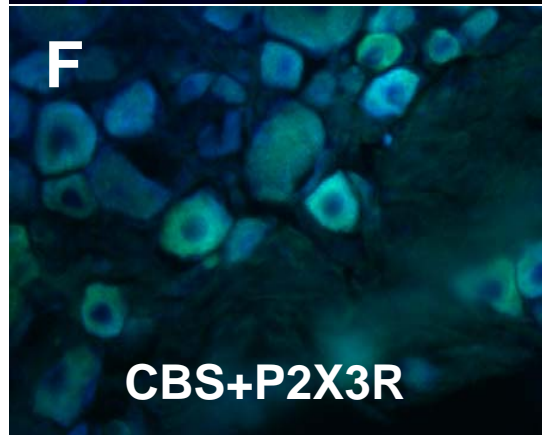

Supplement: MOESM3 [file 9612834]
